# Supplementary material for: Exposure to human relevant mixtures of halogenated persistent organic pollutants (POPs) alters neurodevelopmental processes in human neural stem cells undergoing differentiation
Source: PubMed Central journal article supplement (PMC7992035; doi:10.1016/j.reprotox.2020.12.013), 2021-03

A

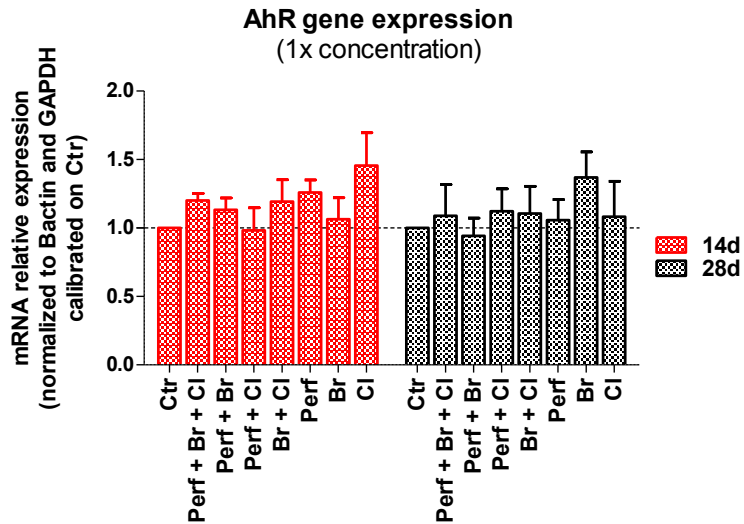

B

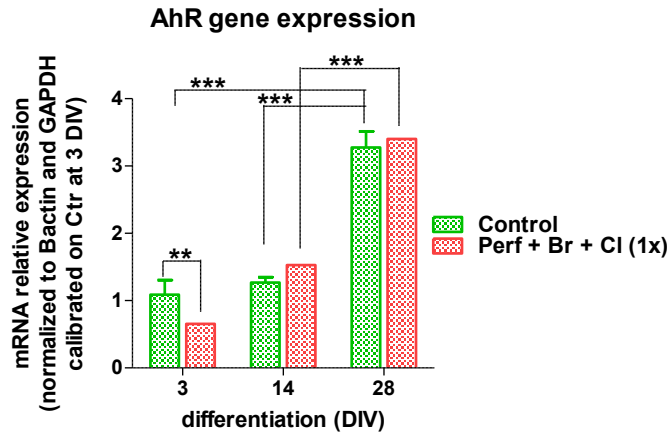

Supplement: mmc3.pdf [file mmc3.pdf]
